# Supplementary material
Source: Springer Nature journal article supplement (https://www.springermedizin.de/resource/supplementary/13048_2008_6_MOESM4_ESM.pdf/9664704)

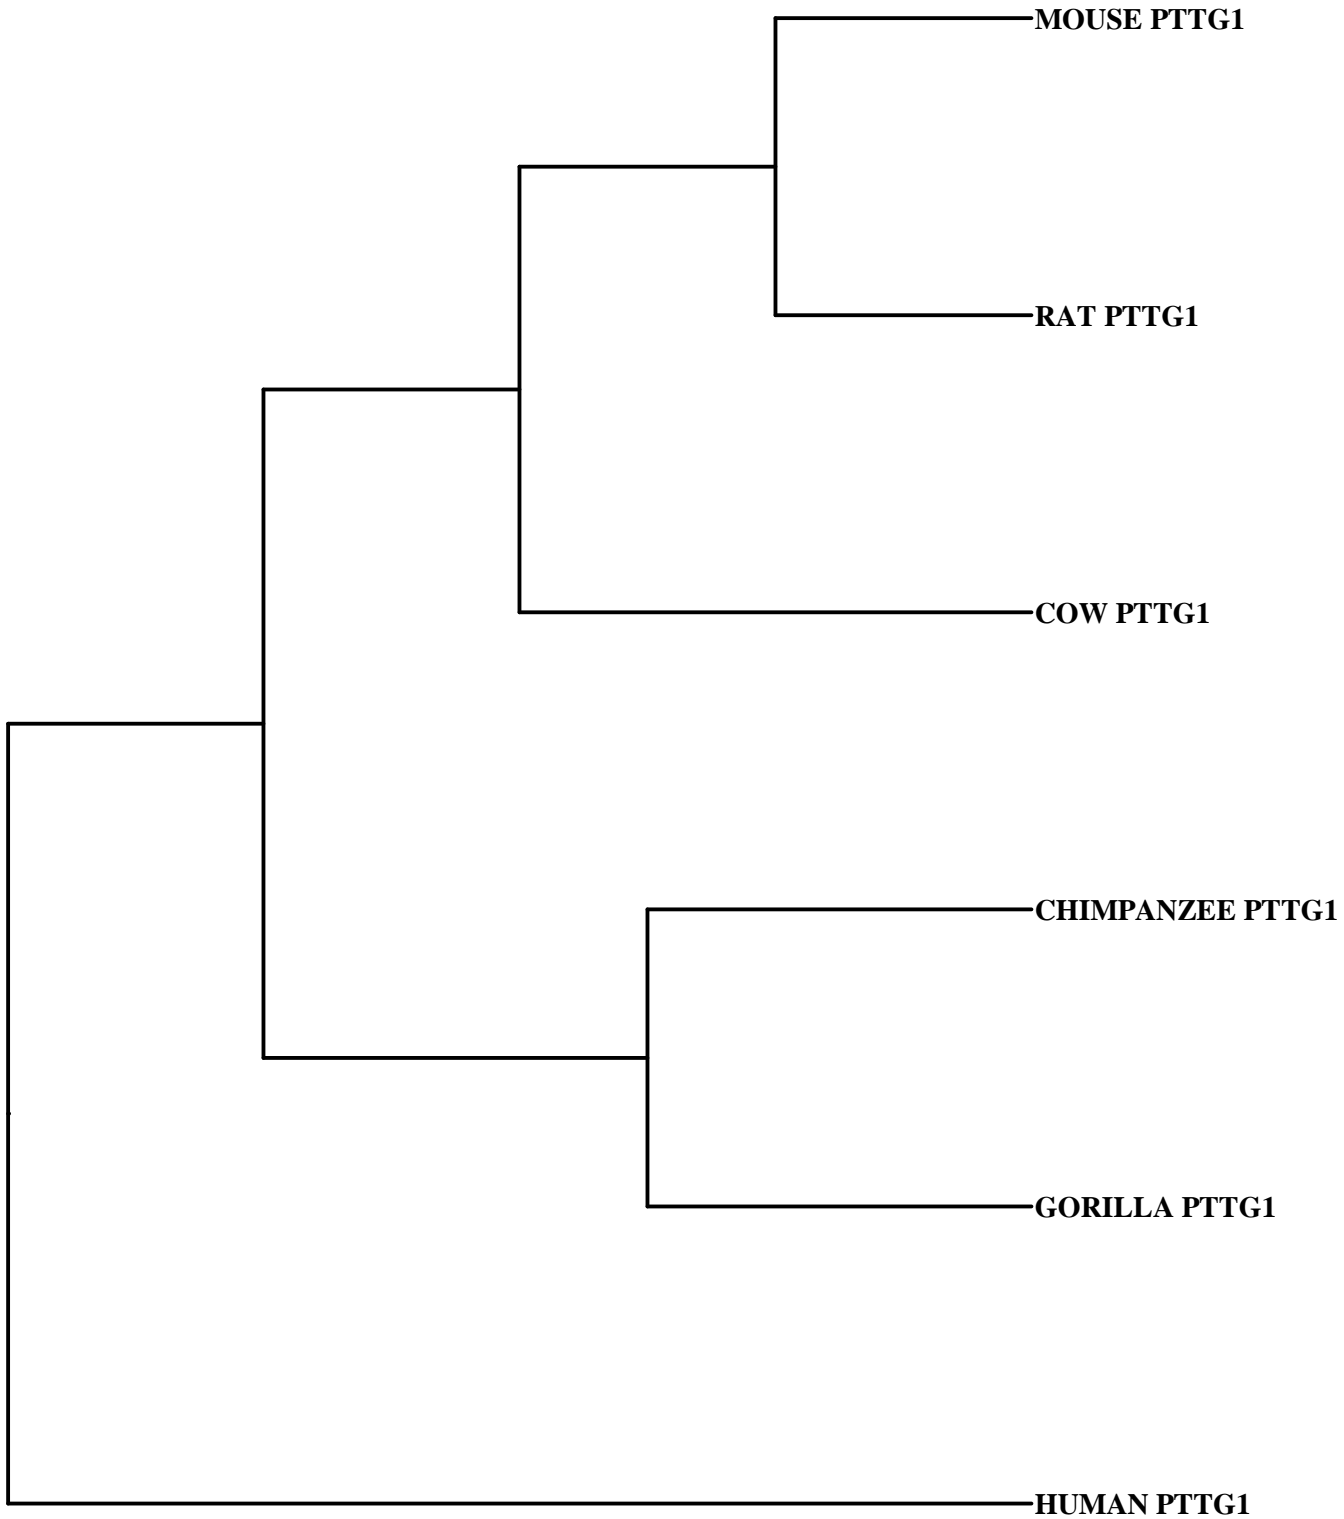

Supplement: MOESM4 [file 9664704]
